# Supplementary material for: Intercomparison of atmospheric water vapour measurements at a Canadian High Arctic site
Source: Copernicus journal article supplement (doi:10.5194/amt-10-2851-2017), 2017-08-11
Supplement: Supplementary file 3 [file amt-10-2851-2017-supplement.zip]

|                       | 125HR<br>(RL)                                                               | GRUAN<br>(EWS, RL pc)                                                        | RS<br>(EWS, RL pc)                                                           | E-AERI<br>(RL)                                                               | SPM<br>(RL)                                                                  |
|-----------------------|-----------------------------------------------------------------------------|------------------------------------------------------------------------------|------------------------------------------------------------------------------|------------------------------------------------------------------------------|------------------------------------------------------------------------------|
| 125HR<br>(RL)         |                                                                             | N = 10<br>R = 0.99<br>m = 1.10                                               | N = 65<br>R = 0.98<br>m = 1.07                                               | N = 191<br>R = 1.00<br>m = 1.06                                              | N = 1304<br>R = 0.99<br>m = 1.16                                             |
|                       |                                                                             | $\Delta$ = -0.44 mm<br>$\sigma$ = 0.61 mm<br>SEM = 0.19 mm<br>RMSD = 0.72 mm | $\Delta$ = -0.78 mm<br>$\sigma$ = 0.73 mm<br>SEM = 0.09 mm<br>RMSD = 1.06 mm | $\Delta$ = -0.46 mm<br>$\sigma$ = 0.42 mm<br>SEM = 0.03 mm<br>RMSD = 0.62 mm | $\Delta$ = -1.04 mm<br>$\sigma$ = 0.65 mm<br>SEM = 0.02 mm<br>RMSD = 1.23 mm |
|                       |                                                                             | PD = -5.15 %<br>$\sigma$ = 10.69 %<br>SEM = 3.38 %<br>RMSD = 11.38 %         | PD = -12.19 %<br>$\sigma$ = 8.90 %<br>SEM = 1.10 %<br>RMSD = 15.05 %         | PD = -6.49 %<br>$\sigma$ = 4.29 %<br>SEM = 0.31 %<br>RMSD = 7.78 %           | PD = -15.10 %<br>$\sigma$ = 6.48 %<br>SEM = 0.18 %<br>RMSD = 16.43 %         |
| GRUAN<br>(EWS, RL pc) | N = 10<br>R = 0.99<br>m = 0.89                                              |                                                                              | N = 2371<br>R = 1.00<br>m = 1.03                                             | N = 68<br>R = 1.00<br>m = 1.02                                               | N = 250<br>R = 0.99<br>m = 1.09                                              |
|                       | $\Delta$ = 0.44 mm<br>$\sigma$ = 0.61 mm<br>SEM = 0.19 mm<br>RMSD = 0.72 mm |                                                                              | $\Delta$ = -0.15 mm<br>$\sigma$ = 0.13 mm<br>SEM = 0.00 mm<br>RMSD = 0.20 mm | $\Delta$ = 0.00 mm<br>$\sigma$ = 0.09 mm<br>SEM = 0.01 mm<br>RMSD = 0.09 mm  | $\Delta$ = -0.62 mm<br>$\sigma$ = 0.63 mm<br>SEM = 0.04 mm<br>RMSD = 0.89 mm |
|                       | PD = 5.15 %<br>$\sigma$ = 10.69 %<br>SEM = 3.38 %<br>RMSD = 11.38 %         |                                                                              | PD = -3.98 %<br>$\sigma$ = 1.29 %<br>SEM = 0.03 %<br>RMSD = 4.18 %           | PD = 0.60 %<br>$\sigma$ = 4.18 %<br>SEM = 0.51 %<br>RMSD = 4.19 %            | PD = -7.85 %<br>$\sigma$ = 7.00 %<br>SEM = 0.44 %<br>RMSD = 10.51 %          |
| RS<br>(EWS, RL pc)    | N = 65<br>R = 0.98<br>m = 0.89                                              | N = 2371<br>R = 1.00<br>m = 0.97                                             |                                                                              | N = 124<br>R = 1.00<br>m = 0.97                                              | N = 1038<br>R = 0.99<br>m = 1.08                                             |
|                       | $\Delta$ = 0.78 mm<br>$\sigma$ = 0.73 mm<br>SEM = 0.09 mm<br>RMSD = 1.06 mm | $\Delta$ = 0.15 mm<br>$\sigma$ = 0.13 mm<br>SEM = 0.00 mm<br>RMSD = 0.20 mm  |                                                                              | $\Delta$ = 0.14 mm<br>$\sigma$ = 0.31 mm<br>SEM = 0.03 mm<br>RMSD = 0.34 mm  | $\Delta$ = -0.39 mm<br>$\sigma$ = 0.60 mm<br>SEM = 0.02 mm<br>RMSD = 0.72 mm |
|                       | PD = 12.19 %<br>$\sigma$ = 8.90 %<br>SEM = 1.10 %<br>RMSD = 15.05 %         | PD = 3.98 %<br>$\sigma$ = 1.29 %<br>SEM = 0.03 %<br>RMSD = 4.18 %            |                                                                              | PD = 5.30 %<br>$\sigma$ = 6.03 %<br>SEM = 0.54 %<br>RMSD = 8.01 %            | PD = -4.31 %<br>$\sigma$ = 7.50 %<br>SEM = 0.23 %<br>RMSD = 8.64 %           |
| E-AERI<br>(RL)        | N = 191<br>R = 1.00<br>m = 0.93                                             | N = 68<br>R = 1.00<br>m = 0.97                                               | N = 124<br>R = 1.00<br>m = 1.02                                              |                                                                              | N = 898<br>R = 0.99<br>m = 1.12                                              |
|                       | $\Delta$ = 0.46 mm<br>$\sigma$ = 0.42 mm<br>SEM = 0.03 mm<br>RMSD = 0.62 mm | $\Delta$ = 0.00 mm<br>$\sigma$ = 0.09 mm<br>SEM = 0.01 mm<br>RMSD = 0.09 mm  | $\Delta$ = -0.14 mm<br>$\sigma$ = 0.31 mm<br>SEM = 0.03 mm<br>RMSD = 0.34 mm |                                                                              | $\Delta$ = -0.47 mm<br>$\sigma$ = 0.49 mm<br>SEM = 0.02 mm<br>RMSD = 0.68 mm |
|                       | PD = 6.49 %<br>$\sigma$ = 4.29 %<br>SEM = 0.31 %<br>RMSD = 7.78 %           | PD = -0.60 %<br>$\sigma$ = 4.18 %<br>SEM = 0.51 %<br>RMSD = 4.19 %           | PD = -5.30 %<br>$\sigma$ = 6.03 %<br>SEM = 0.54 %<br>RMSD = 8.01 %           |                                                                              | PD = -5.61 %<br>$\sigma$ = 4.62 %<br>SEM = 0.15 %<br>RMSD = 7.27 %           |
| SPM<br>(RL)           | N = 1304<br>R = 0.99<br>m = 0.84                                            | N = 250<br>R = 0.99<br>m = 0.90                                              | N = 1038<br>R = 0.99<br>m = 0.90                                             | N = 898<br>R = 0.99<br>m = 0.88                                              |                                                                              |
|                       | $\Delta$ = 1.04 mm<br>$\sigma$ = 0.65 mm<br>SEM = 0.02 mm<br>RMSD = 1.23 mm | $\Delta$ = 0.62 mm<br>$\sigma$ = 0.63 mm<br>SEM = 0.04 mm<br>RMSD = 0.89 mm  | $\Delta$ = 0.39 mm<br>$\sigma$ = 0.60 mm<br>SEM = 0.02 mm<br>RMSD = 0.72 mm  | $\Delta$ = 0.47 mm<br>$\sigma$ = 0.49 mm<br>SEM = 0.02 mm<br>RMSD = 0.68 mm  |                                                                              |
|                       | PD = 15.10 %<br>$\sigma$ = 6.48 %<br>SEM = 0.18 %<br>RMSD = 16.43 %         | PD = 7.85 %<br>$\sigma$ = 7.00 %<br>SEM = 0.44 %<br>RMSD = 10.51 %           | PD = 4.31 %<br>$\sigma$ = 7.50 %<br>SEM = 0.23 %<br>RMSD = 8.64 %            | PD = 5.61 %<br>$\sigma$ = 4.62 %<br>SEM = 0.15 %<br>RMSD = 7.27 %            |                                                                              |
