# Supplementary material for: Intercomparison of atmospheric water vapour measurements at a Canadian High Arctic site
Source: Copernicus journal article supplement (doi:10.5194/amt-10-2851-2017), 2017-08-11
Supplement: Supplementary file 4 [file amt-10-2851-2017-supplement.zip]

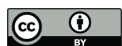

## *Supplement of*

# **Intercomparison of atmospheric water vapour measurements at a Canadian High Arctic site**

**Dan Weaver et al.**

*Correspondence to:* Dan Weaver ([dweaver@atmosp.physics.utoronto.ca](mailto:dweaver@atmosp.physics.utoronto.ca))

- [amt-10-2851-2017-supplement-title-page.pdf](#)
- [FigS1 \(rev\).pdf](#)
- [FigS2 \(rev\).pdf](#)
- [TableS1.pdf](#)
- [TableS2.pdf](#)
- [TableS3.pdf](#)

The copyright of individual parts of the supplement might differ from the CC BY 3.0 License.
