# Supplementary material for: Intercomparison of atmospheric water vapour measurements at a Canadian High Arctic site
Source: Copernicus journal article supplement (doi:10.5194/amt-10-2851-2017), 2017-08-11
Supplement: Supplementary file 5 [file amt-10-2851-2017-supplement.zip]

|                               | <b>MUSICA<br/>v2012<br/>(coincident with v2015)</b>                          | <b>MUSICA<br/>v2015<br/>(coincident with v2012)</b>                         |
|-------------------------------|------------------------------------------------------------------------------|-----------------------------------------------------------------------------|
| <b>MUSICA<br/>v2015</b>       | N = 2046<br>R = 1.00<br>m = 1.05                                             |                                                                             |
|                               | $\Delta$ = -0.31 mm<br>$\sigma$ = 0.19 mm<br>SEM = 0.00 mm<br>RMSD = 0.37 mm |                                                                             |
|                               | PD = -5.63 %<br>$\sigma$ = 0.96 %<br>SEM = 0.02 %<br>RMSD = 5.71 %           |                                                                             |
|                               |                                                                              |                                                                             |
| <b>GRUAN<br/>(EWS, RL pc)</b> | N = 10<br>R = 0.99<br>m = 0.94                                               | N = 10<br>R = 0.99<br>m = 0.89                                              |
|                               | $\Delta$ = 0.17 mm<br>$\sigma$ = 0.41 mm<br>SEM = 0.13 mm<br>RMSD = 0.43 mm  | $\Delta$ = 0.44 mm<br>$\sigma$ = 0.61 mm<br>SEM = 0.19 mm<br>RMSD = 0.72 mm |
|                               | PD = 0.65 %<br>$\sigma$ = 10.44 %<br>SEM = 3.30 %<br>RMSD = 9.92 %           | PD = 5.15 %<br>$\sigma$ = 10.69 %<br>SEM = 3.38 %<br>RMSD = 11.38 %         |
|                               |                                                                              |                                                                             |
| <b>RS<br/>(EWS, RL pc)</b>    | N = 35<br>R = 0.98<br>m = 0.90                                               | N = 35<br>R = 0.99<br>m = 0.87                                              |
|                               | $\Delta$ = 0.52 mm<br>$\sigma$ = 0.62 mm<br>SEM = 0.10 mm<br>RMSD = 0.80 mm  | $\Delta$ = 0.78 mm<br>$\sigma$ = 0.65 mm<br>SEM = 0.11 mm<br>RMSD = 1.01 mm |
|                               | PD = 8.00 %<br>$\sigma$ = 8.13 %<br>SEM = 1.37 %<br>RMSD = 11.37 %           | PD = 12.11 %<br>$\sigma$ = 7.71 %<br>SEM = 1.30 %<br>RMSD = 14.30 %         |
|                               |                                                                              |                                                                             |
| <b>E-AERI<br/>(RL)</b>        | N = 191<br>R = 1.00<br>m = 0.98                                              | N = 191<br>R = 1.00<br>m = 0.93                                             |
|                               | $\Delta$ = 0.06 mm<br>$\sigma$ = 0.33 mm<br>SEM = 0.02 mm<br>RMSD = 0.34 mm  | $\Delta$ = 0.46 mm<br>$\sigma$ = 0.42 mm<br>SEM = 0.03 mm<br>RMSD = 0.62 mm |
|                               | PD = 0.58 %<br>$\sigma$ = 4.13 %<br>SEM = 0.30 %<br>RMSD = 4.16 %            | PD = 6.49 %<br>$\sigma$ = 4.29 %<br>SEM = 0.31 %<br>RMSD = 7.78 %           |
|                               |                                                                              |                                                                             |
| <b>SPM<br/>(RL)</b>           | N = 1109<br>R = 0.99<br>m = 0.89                                             | N = 1109<br>R = 0.99<br>m = 0.85                                            |
|                               | $\Delta$ = 0.60 mm<br>$\sigma$ = 0.51 mm<br>SEM = 0.02 mm<br>RMSD = 0.79 mm  | $\Delta$ = 1.00 mm<br>$\sigma$ = 0.63 mm<br>SEM = 0.02 mm<br>RMSD = 1.18 mm |
|                               | PD = 8.67 %<br>$\sigma$ = 5.85 %<br>SEM = 0.18 %<br>RMSD = 10.46 %           | PD = 14.60 %<br>$\sigma$ = 5.71 %<br>SEM = 0.17 %<br>RMSD = 15.68 %         |
|                               |                                                                              |                                                                             |
