# Supplementary material for: Intercomparison of atmospheric water vapour measurements at a Canadian High Arctic site
Source: Copernicus journal article supplement (doi:10.5194/amt-10-2851-2017), 2017-08-11
Supplement: Supplementary file 6 [file amt-10-2851-2017-supplement.zip]

|                  | E-AERI<br>(0PAL)                                                             | P-AERI<br>(0PAL)                                                             | MWR<br>(0PAL)                                                                | GRUAN<br>(EWS)                                                              | RS<br>(EWS)                                                                  | SPM<br>(0PAL)                                                                |
|------------------|------------------------------------------------------------------------------|------------------------------------------------------------------------------|------------------------------------------------------------------------------|-----------------------------------------------------------------------------|------------------------------------------------------------------------------|------------------------------------------------------------------------------|
| E-AERI<br>(0PAL) |                                                                              | N = 0                                                                        | N = 0                                                                        | N = 300<br>R = 1.00<br>m = 0.97                                             | N = 475<br>R = 1.00<br>m = 1.01                                              | N = 1685<br>R = 0.98<br>m = 1.05                                             |
|                  |                                                                              |                                                                              |                                                                              | $\Delta$ = 0.11 mm<br>$\sigma$ = 0.28 mm<br>SEM = 0.02 mm<br>RMSD = 0.30 mm | $\Delta$ = -0.10 mm<br>$\sigma$ = 0.26 mm<br>SEM = 0.01 mm<br>RMSD = 0.28 mm | $\Delta$ = -0.43 mm<br>$\sigma$ = 0.55 mm<br>SEM = 0.01 mm<br>RMSD = 0.70 mm |
|                  |                                                                              |                                                                              |                                                                              | PD = 0.98 %<br>$\sigma$ = 4.55 %<br>SEM = 0.26 %<br>RMSD = 4.65 %           | PD = -3.20 %<br>$\sigma$ = 4.27 %<br>SEM = 0.20 %<br>RMSD = 5.34 %           | PD = -3.27 %<br>$\sigma$ = 4.32 %<br>SEM = 0.11 %<br>RMSD = 5.42 %           |
| P-AERI<br>(0PAL) | N = 0                                                                        |                                                                              | N = 46,054<br>R = 0.99<br>m = 1.09                                           | N = 108<br>R = 1.00<br>m = 0.93                                             | N = 639<br>R = 1.00<br>m = 0.97                                              | N = 7248<br>R = 0.99<br>m = 1.02                                             |
|                  |                                                                              |                                                                              | $\Delta$ = -0.14 mm<br>$\sigma$ = 0.52 mm<br>SEM = 0.00 mm<br>RMSD = 0.54 mm | $\Delta$ = 0.02 mm<br>$\sigma$ = 0.14 mm<br>SEM = 0.01 mm<br>RMSD = 0.14 mm | $\Delta$ = 0.00 mm<br>$\sigma$ = 0.29 mm<br>SEM = 0.01 mm<br>RMSD = 0.29 mm  | $\Delta$ = -0.23 mm<br>$\sigma$ = 0.42 mm<br>SEM = 0.00 mm<br>RMSD = 0.48 mm |
|                  |                                                                              |                                                                              | PD = 1.48 %<br>$\sigma$ = 16.23%<br>SEM = 0.08 %<br>RMSD = 16.30 %           | PD = -0.47 %<br>$\sigma$ = 4.21 %<br>SEM = 0.41 %<br>RMSD = 4.22 %          | PD = -1.72 %<br>$\sigma$ = 5.74 %<br>SEM = 0.23 %<br>RMSD = 5.99 %           | PD = -2.19 %<br>$\sigma$ = 4.13 %<br>SEM = 0.05 %<br>RMSD = 4.67 %           |
| MWR<br>(0PAL)    | N = 0                                                                        | N = 46,054<br>R = 0.99<br>m = 0.91                                           |                                                                              | N = 693<br>R = 0.92<br>m = 0.86                                             | N = 2527<br>R = 0.98<br>m = 0.90                                             | N = 20,396<br>R = 0.98<br>m = 0.98                                           |
|                  |                                                                              | $\Delta$ = 0.14 mm<br>$\sigma$ = 0.52 mm<br>SEM = 0.00 mm<br>RMSD = 0.54 mm  |                                                                              | $\Delta$ = 0.13 mm<br>$\sigma$ = 1.21 mm<br>SEM = 0.05 mm<br>RMSD = 1.21 mm | $\Delta$ = 0.19 mm<br>$\sigma$ = 0.88 mm<br>SEM = 0.02 mm<br>RMSD = 0.90 mm  | $\Delta$ = 0.56 mm<br>$\sigma$ = 0.59 mm<br>SEM = 0.00 mm<br>RMSD = 0.82 mm  |
|                  |                                                                              | PD = -1.48 %<br>$\sigma$ = 16.23 %<br>SEM = 0.08 %<br>RMSD = 16.30 %         |                                                                              | PD = -2.20 %<br>$\sigma$ = 20.47 %<br>SEM = 0.78 %<br>RMSD = 20.57 %        | PD = -1.88<br>$\sigma$ = 17.33 %<br>SEM = 0.34 %<br>RMSD = 17.43 %           | PD = 6.87 %<br>$\sigma$ = 7.76 %<br>SEM = 0.05 %<br>RMSD = 10.37 %           |
| GRUAN<br>(EWS)   | N = 300<br>R = 1.00<br>m = 1.02                                              | N = 108<br>R = 1.00<br>m = 1.07                                              | N = 693<br>R = 0.92<br>m = 0.99                                              |                                                                             | N = 2371<br>R = 1.00<br>m = 1.03                                             | N = 264<br>R = 0.99<br>m = 1.05                                              |
|                  | $\Delta$ = -0.11 mm<br>$\sigma$ = 0.28 mm<br>SEM = 0.02 mm<br>RMSD = 0.30 mm | $\Delta$ = -0.02 mm<br>$\sigma$ = 0.14 mm<br>SEM = 0.01 mm<br>RMSD = 0.14 mm | $\Delta$ = -0.13 mm<br>$\sigma$ = 1.21 mm<br>SEM = 0.05 mm<br>RMSD = 1.21 mm |                                                                             | $\Delta$ = -0.19 mm<br>$\sigma$ = 0.16 mm<br>SEM = 0.00 mm<br>RMSD = 0.25 mm | $\Delta$ = -0.20 mm<br>$\sigma$ = 0.61 mm<br>SEM = 0.04 mm<br>RMSD = 0.64 mm |
|                  | PD = -0.98 %<br>$\sigma$ = 4.55 %<br>SEM = 0.26 %<br>RMSD = 4.65 %           | PD = 0.47 %<br>$\sigma$ = 4.21 %<br>SEM = 0.41 %<br>RMSD = 4.22 %            | PD = 2.20 %<br>$\sigma$ = 20.47 %<br>SEM = 0.78 %<br>RMSD = 20.57 %          |                                                                             | PD = -3.72 %<br>$\sigma$ = 1.96 %<br>SEM = 0.04 %<br>RMSD = 4.20 %           | PD = -0.72 %<br>$\sigma$ = 5.83 %<br>SEM = 0.36 %<br>RMSD = 5.86 %           |
| RS<br>(EWS)      | N = 475<br>R = 1.00<br>m = 0.99                                              | N = 639<br>R = 1.00<br>m = 1.02                                              | N = 2527<br>R = 0.98<br>m = 1.07                                             | N = 2371<br>R = 1.00<br>m = 0.97                                            |                                                                              | N = 692<br>R = 0.99<br>m = 1.05                                              |
|                  | $\Delta$ = 0.10 mm<br>$\sigma$ = 0.26 mm<br>SEM = 0.01 mm<br>RMSD = 0.28 mm  | $\Delta$ = 0.00 mm<br>$\sigma$ = 0.29 mm<br>SEM = 0.01 mm<br>RMSD = 0.29 mm  | $\Delta$ = -0.19 mm<br>$\sigma$ = 0.88 mm<br>SEM = 0.02 mm<br>RMSD = 0.90 mm | $\Delta$ = 0.19 mm<br>$\sigma$ = 0.16 mm<br>SEM = 0.00 mm<br>RMSD = 0.25 mm |                                                                              | $\Delta$ = -0.07 mm<br>$\sigma$ = 0.67 mm<br>SEM = 0.03 mm<br>RMSD = 0.67 mm |
|                  | PD = 3.20 %<br>$\sigma$ = 4.27 %<br>SEM = 0.20 %<br>RMSD = 5.34 %            | PD = 1.72 %<br>$\sigma$ = 5.74 %<br>SEM = 0.23 %<br>RMSD = 5.99 %            | PD = 1.88 %<br>$\sigma$ = 17.33 %<br>SEM = 0.34 %<br>RMSD = 17.43 %          | PD = 3.72 %<br>$\sigma$ = 1.96 %<br>SEM = 0.04 %<br>RMSD = 4.20 %           |                                                                              | PD = 0.40 %<br>$\sigma$ = 6.63 %<br>SEM = 0.25 %<br>RMSD = 6.64 %            |
| SPM<br>(0PAL)    | N = 1685<br>R = 0.98<br>m = 0.92                                             | N = 7248<br>R = 0.99<br>m = 0.96                                             | N = 20,396<br>R = 0.98<br>m = 0.98                                           | N = 264<br>R = 0.99<br>m = 0.93                                             | N = 692<br>R = 0.99<br>m = 0.93                                              |                                                                              |
|                  | $\Delta$ = 0.43 mm<br>$\sigma$ = 0.55 mm<br>SEM = 0.01 mm<br>RMSD = 0.70 mm  | $\Delta$ = 0.23 mm<br>$\sigma$ = 0.42 mm<br>SEM = 0.00 mm<br>RMSD = 0.48 mm  | $\Delta$ = -0.56 mm<br>$\sigma$ = 0.59 mm<br>SEM = 0.00 mm<br>RMSD = 0.82 mm | $\Delta$ = 0.20 mm<br>$\sigma$ = 0.61 mm<br>SEM = 0.04 mm<br>RMSD = 0.64 mm | $\Delta$ = 0.07 mm<br>$\sigma$ = 0.67 mm<br>SEM = 0.03 mm<br>RMSD = 0.67 mm  |                                                                              |
|                  | PD = 3.27 %<br>$\sigma$ = 4.32 %<br>SEM = 0.11 %<br>RMSD = 5.42 %            | PD = 2.19 %<br>$\sigma$ = 4.13 %<br>SEM = 0.05 %<br>RMSD = 4.67 %            | PD = -6.87 %<br>$\sigma$ = 7.76 %<br>SEM = 0.05 %<br>RMSD = 10.37 %          | PD = 0.72 %<br>$\sigma$ = 5.83 %<br>SEM = 0.36 %<br>RMSD = 5.86 %           | PD = -0.40 %<br>$\sigma$ = 6.63 %<br>SEM = 0.25 %<br>RMSD = 6.64 %           |                                                                              |
