# Supplementary figures and images for: Intercomparison of atmospheric water vapour measurements at a Canadian High Arctic site
Source: Copernicus journal article supplement (doi:10.5194/amt-10-2851-2017), 2017-08-11

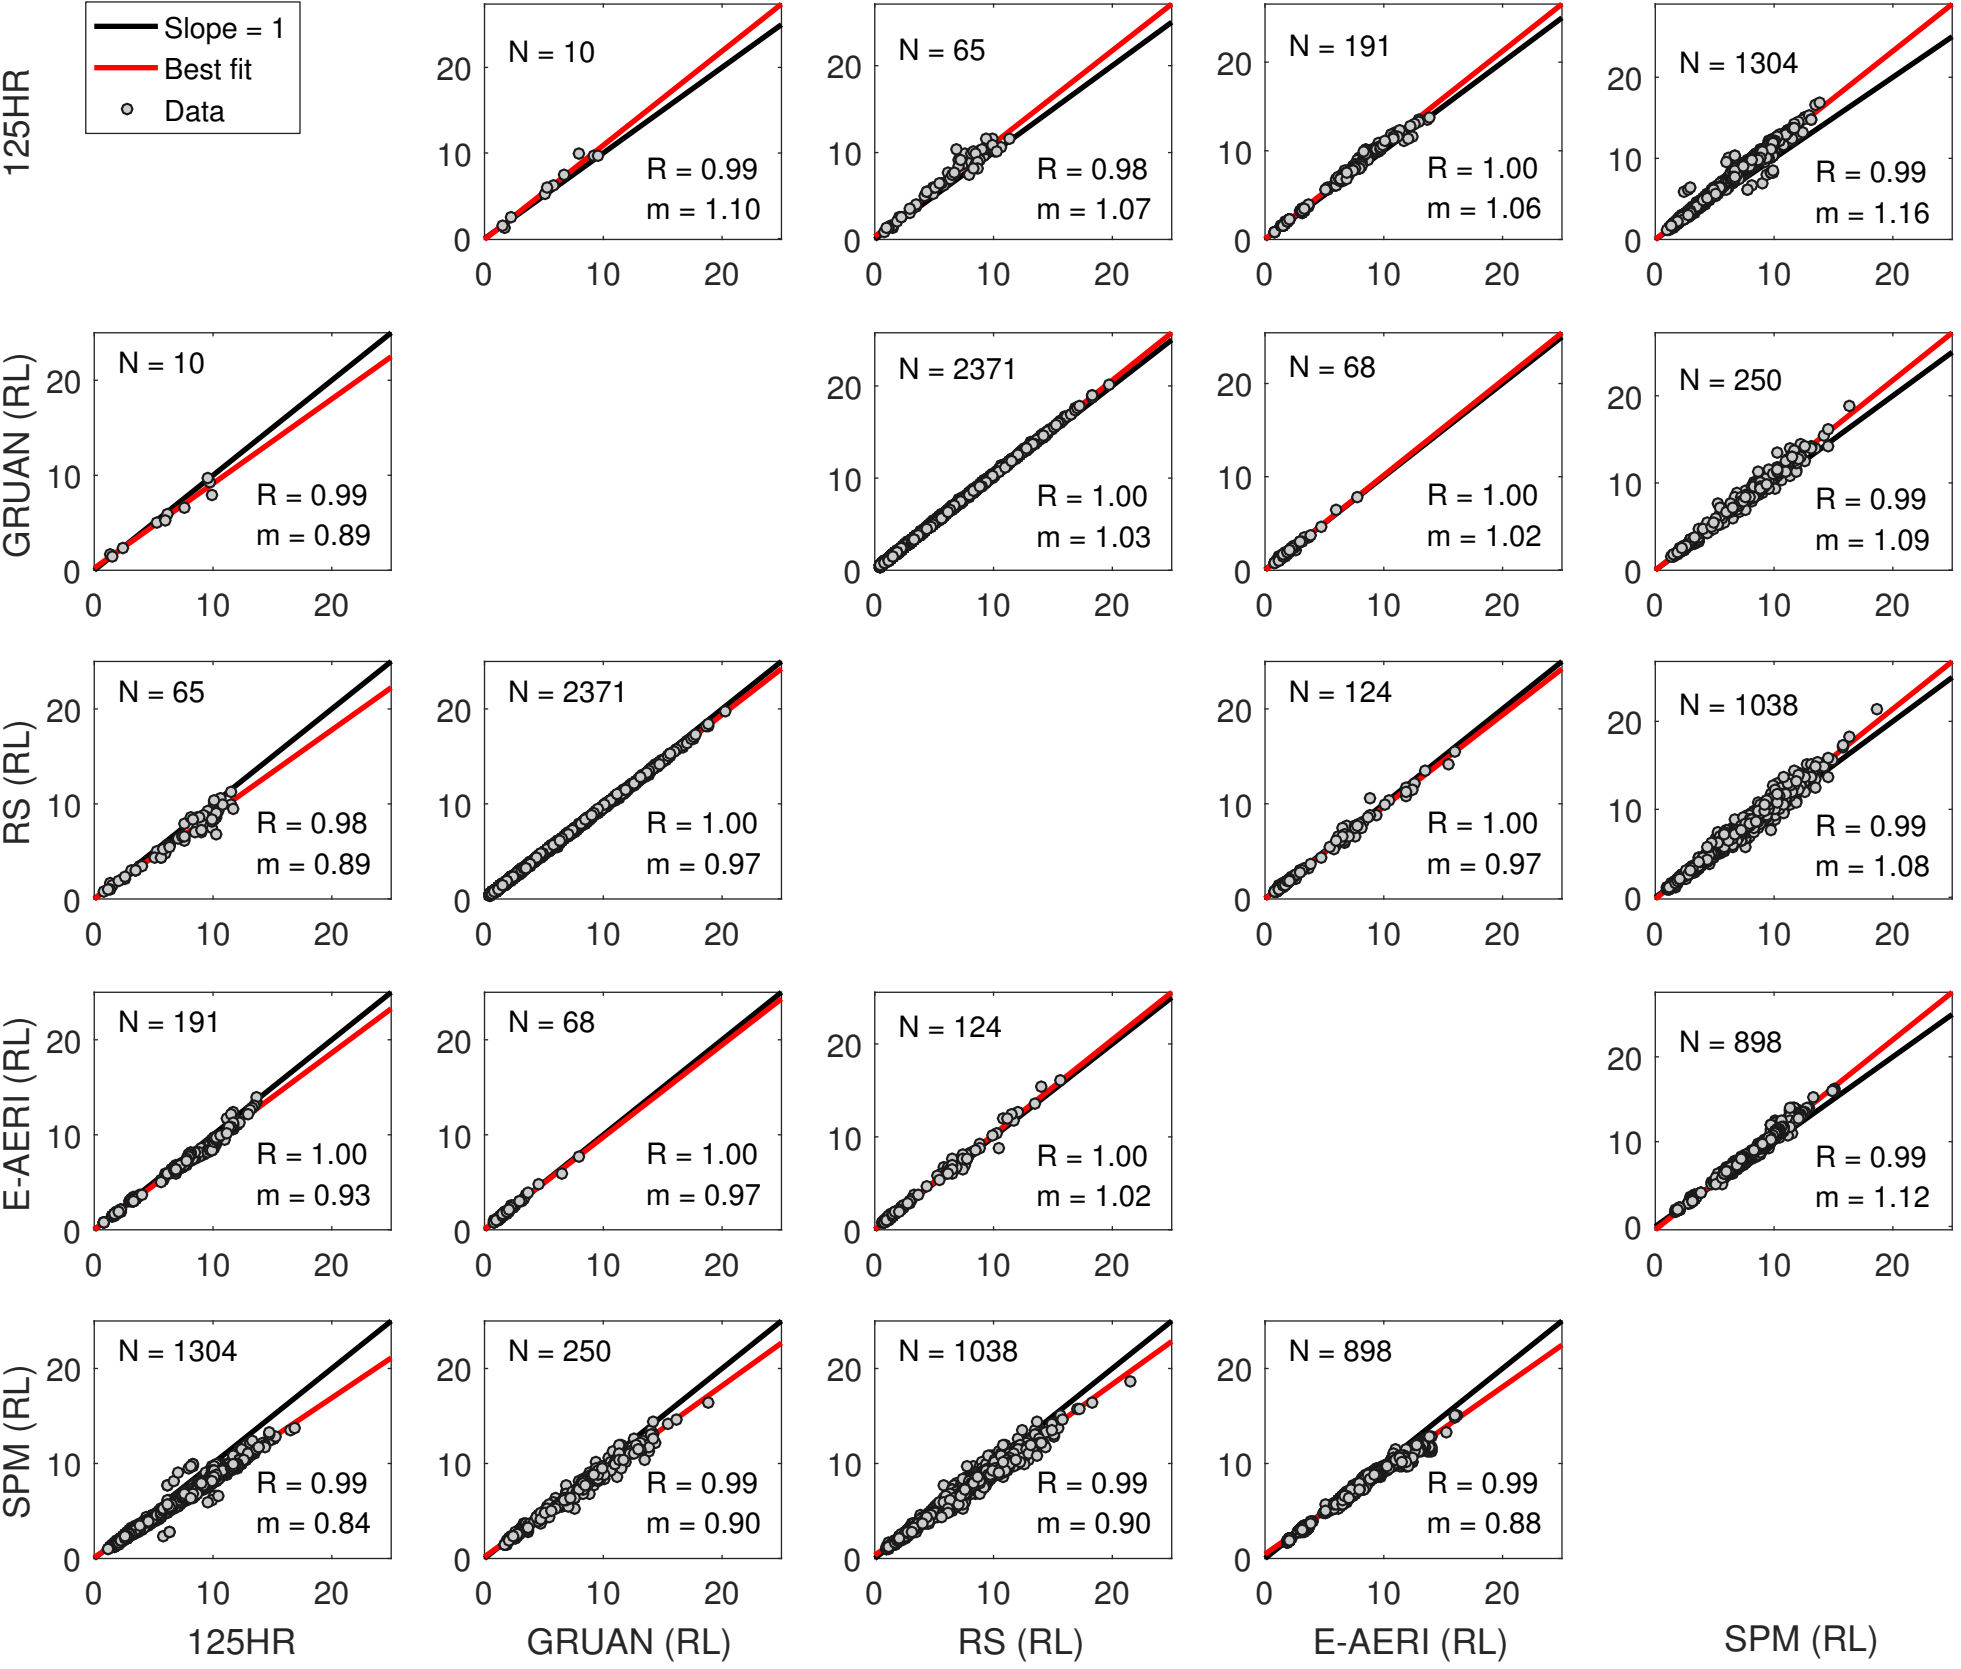

Supplement: Supplementary file 1 [file amt-10-2851-2017-supplement.zip]

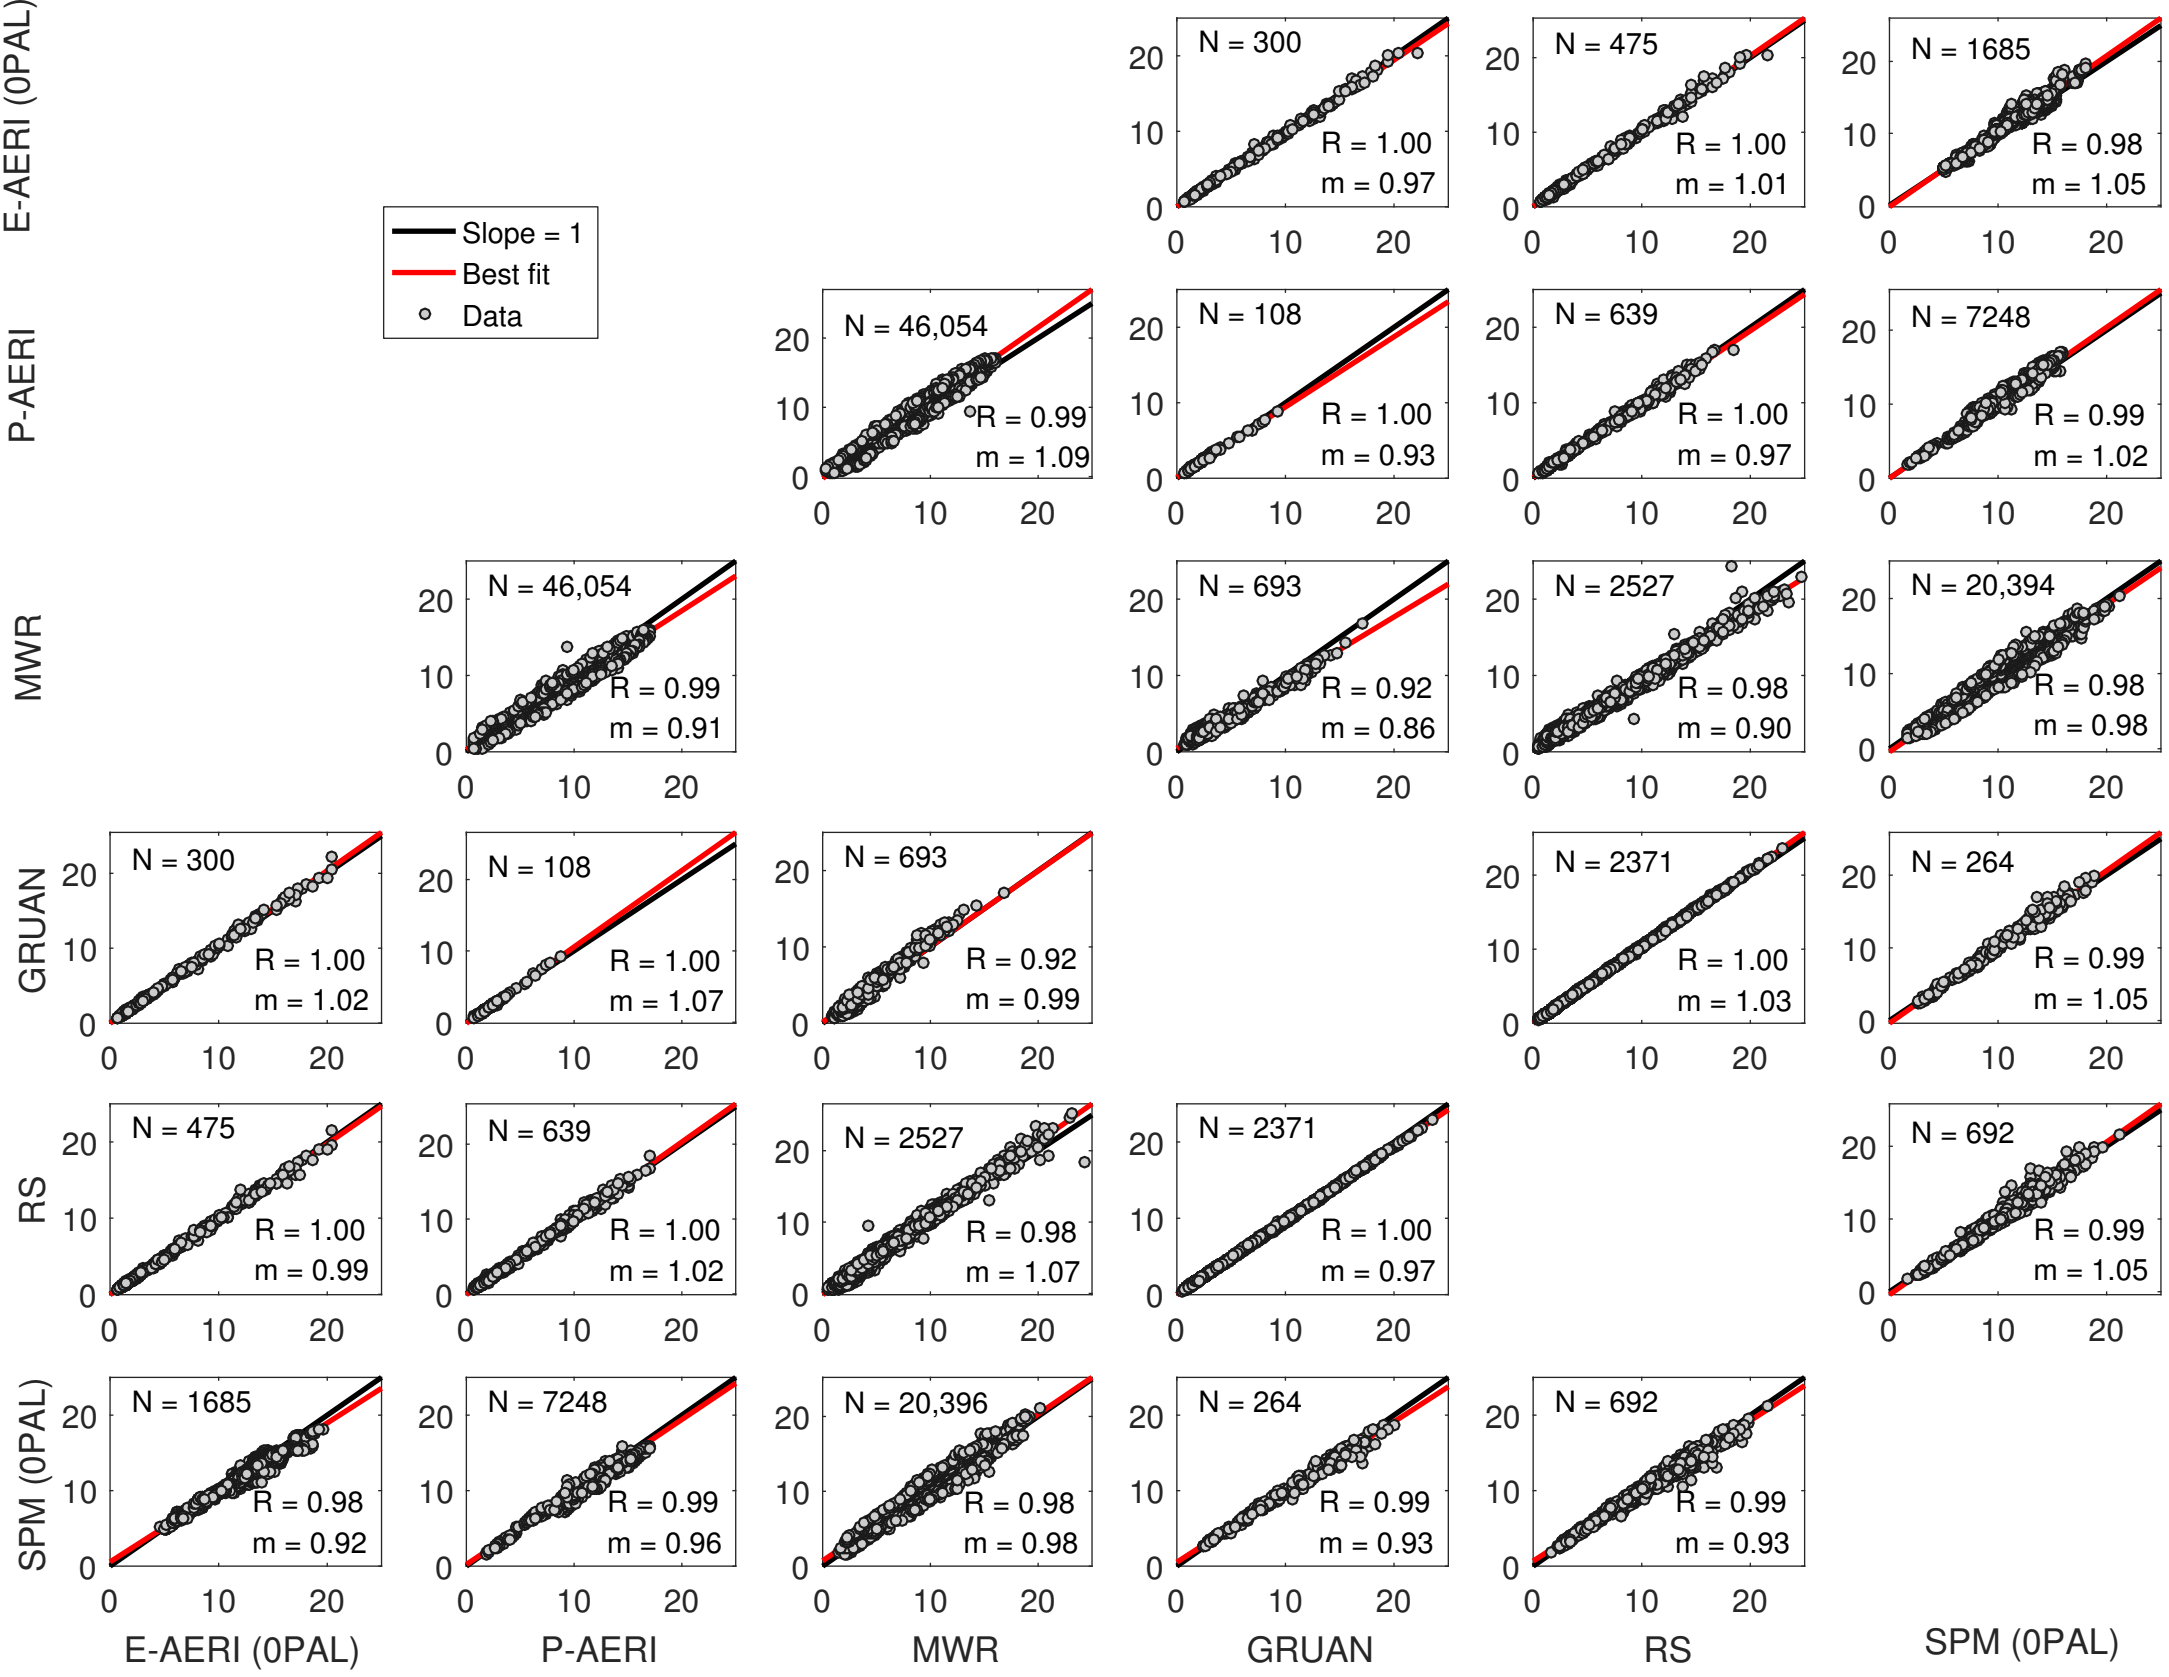

Supplement: Supplementary file 2 [file amt-10-2851-2017-supplement.zip]
